# Supplementary material
Source: PubMed Central journal article supplement (PMC7610631)
Supplement: EMS121908-supplement-Supplementary_Materials_and_Methods.pdf [file EMS121908-supplement-Supplementary_Materials_and_Methods.pdf]

## **Supplementary Materials and Methods S1: Search Strategies in EMBASE and Medline.**

### **EMBASE**

1. exp cancer risk/ or risk\*.mp. or exp risk/ or exp risk factor/ or exp risk assessment/
2. chance\*.mp.
3. exp probability/ or likelihood\*.mp.
4. 1 or 2 or 3
5. exp mathematical model/ or model\*.mp. or exp model/
6. exp prediction/ or predict\*.mp.
7. score.mp.
8. 5 or 6 or 7
9. ((colorectal or rect\* or colon\*) adj3 (cancer\* or neoplas\* or tumour\* or tumor\*)).ti,ab.
10. exp colon tumor/
11. exp rectum tumor/
12. exp colorectal cancer/
13. 9 or 10 or 11 or 12
14. 4 and 8 and 13
15. review.pt.
16. letter.pt.
17. editorial.pt.
18. 15 or 16 or 17
19. 14 not 18
20. limit 19 to yr="2014 -Current"

### **Medline**

1. exp Risk Factors/ or risk\*.mp. or exp Risk/ or exp Risk Assessment/
2. chance\*.mp.
3. likelihood\*.mp. or exp Probability/
4. 1 or 2 or 3
5. predict\*.mp.
6. exp "Early Detection of Cancer"/
7. exp models, statistical/
8. exp Models, Statistical/ or model\*.mp.
9. Score\*.mp.
10. 5 or 6 or 7 or 8 or 9
11. exp Colorectal Neoplasms/
12. ((colorectal or rect\* or colon\*) adj3 (cancer\* or neoplas\* or tumour\* or tumor\*)).ti,ab.
13. 11 or 12
14. 4 and 10 and 13
15. Review/
16. Comment/
17. Letter/
18. Editorial/
19. 15 or 16 or 17 or 18
20. 14 not 19
21. limit 20 to yr="2014 -Current"
