# Supplementary material
Source: PubMed Central journal article supplement (PMC7610631)
Supplement: EMS121908-supplement-Supplementary_Table_S1.pdf [file EMS121908-supplement-Supplementary_Table_S1.pdf]

Supplementary Table S1. Details of populations for model development and validation

| Author, year            | Country                                                              | Period of study                | Selection of cases                                                                                                                                                                                       | Selection of controls                                                                                                                                                                     | Exclusions                                              | Number of cases:controls            | Gender of cases:controls (male, %) | Age of cases:controls (mean (SD))                     |
|-------------------------|----------------------------------------------------------------------|--------------------------------|----------------------------------------------------------------------------------------------------------------------------------------------------------------------------------------------------------|-------------------------------------------------------------------------------------------------------------------------------------------------------------------------------------------|---------------------------------------------------------|-------------------------------------|------------------------------------|-------------------------------------------------------|
| Abe 2017                | Japan                                                                | 2001-2005 (d)<br>2005-2013 (v) | Histologically confirmed CRC at one hospital                                                                                                                                                             | Randomly selected from patients attending outpatient clinic during the same period with no history of cancer or neoplasms confirmed by examination. Matched by age (+/- 5 years) and sex. | Prior history of cancer                                 | 558:1116 (d)<br>547:547 (v)         | 62.7:62.7 (d)<br>65.5:65.5 (v)     | 60 (10.3): 60 (10.10) (d)<br>61 (9.96): 61 (9.96) (v) |
| Dunlop 2013a and b      | UK, Canada, Australia, USA and Germany (d)<br>Sweden and Finland (v) | Prior to 2013 (d and v)        | Hospitals, clinical genetics centres and oncology clinics records from 13 datasets for development and two datasets for validation                                                                       | Healthy individuals and cancer-free spouses (d) and blood donors and cancer-free spouses (v)                                                                                              |                                                         | 24,395: 19,994 (d)<br>2479:2169 (v) | 56.7:46.6 (d)<br>Not reported (v)  | N/A                                                   |
| Frampton 2016           | UK                                                                   | 2001-2012 (v)                  | CRC cases from VQ58 GWAS (two UK-based adjuvant chemotherapy clinical trials (VICTOR and QUASAR2))                                                                                                       | From UK population-based 1958 Birth Cohort                                                                                                                                                | Not given                                               | 1800:2690                           | Not reported                       | Not reported                                          |
| Hosono 2016a and b      | Japan                                                                | 2001-2005 (d)<br>2005-2013 (v) | Histologically confirmed CRC at one hospital                                                                                                                                                             | Randomly selected from patients attending outpatient clinic during the same period with no history of cancer or neoplasms confirmed by examination. Matched by age (+/- 5 years) and sex. | Prior history of cancer                                 | 558:1116 (d)<br>547:547 (v)         | 62.7:62.7 (d)<br>65.5:65.5 (v)     | 60 (10.3): 60 (10.10) (d)<br>61 (9.96): 61 (9.96) (v) |
| Hsu 2015                | USA and Germany                                                      | 1990-2011 (d)<br>1993-2001 (v) | Colorectal adenocarcinoma confirmed by medical records, pathology reports, or death certificate from 2 case-control and 4 nested case-control studies and 1 screening trial for validation               | Randomly selected from population registries, drivers' license records or state identification lists.                                                                                     | Not of European descent                                 | 5811:6302 (d)<br>866:869 (v)        | Not reported                       | Not reported                                          |
| Huyghe 2019             | European (91.7%) and East Asian (8.3%) (d)                           | Not given (d)                  | Varied between incorporated studies.                                                                                                                                                                     | Varied between incorporated studies.                                                                                                                                                      | Not given                                               | 58131:67347                         | Not reported                       | Not reported                                          |
| Ibanez-Sanz 2017a and b | Spain                                                                | 2008-2013 (d and v)            | Age 20-85 with histologically confirmed CRC, having resided in the catchment area for at least 6 months prior to recruitment. Enrolled in 23 hospitals and primary care centres in 12 Spanish provinces. | Frequency-matched to cases, by age, sex and region, ensuring that in each region there was at least one control of the same sex and 5-year interval for each case.                        | Personal history of CRC                                 | 1336:2744                           | 53.53:64.75                        | Not reported                                          |
| Iwasaki 2017            | Japan                                                                | 1990-2009 (d and v)            | New cases of CRC in the JPHC cohort study (9 public health centres) identified through active patient notifications, data linkage with                                                                   | Individuals in JPHC cohort study with no prior history of CRC at time when case diagnosed. Matched by sex, age (within 3 years), date of                                                  | Women, history of cancer at baseline or no blood sample | 341:329                             | 100:100                            | Not reported                                          |

|                    |                                             |                     |                                                                                                                                                                                                                                                                                    |                                                                                                                                                                                                                                                                                                 |                                                                                                                                                           |                                                |                                                 |                                                                                                                                       |
|--------------------|---------------------------------------------|---------------------|------------------------------------------------------------------------------------------------------------------------------------------------------------------------------------------------------------------------------------------------------------------------------------|-------------------------------------------------------------------------------------------------------------------------------------------------------------------------------------------------------------------------------------------------------------------------------------------------|-----------------------------------------------------------------------------------------------------------------------------------------------------------|------------------------------------------------|-------------------------------------------------|---------------------------------------------------------------------------------------------------------------------------------------|
|                    |                                             |                     | population-based cancer registries and death certificates                                                                                                                                                                                                                          | blood withdrawal (within 3 months), time since last meal at blood withdrawal (within 4 hours), and study location                                                                                                                                                                               |                                                                                                                                                           |                                                |                                                 |                                                                                                                                       |
| Jenkins 2016, 2019 | Australia, Canada, USA                      | N/A (v)             | Simulation study: Simulation population including 1,000,000 individuals with CRC<br><br>External validation study: invasive colon or rectum cancer identified from population-based cancer registries.                                                                             | Simulation study: Simulation population including 1,000,000 individuals without CRC<br><br>External validation study: persons with no CRC diagnosis randomly selected from the general population by using Medicare and Driver's License files, telephone subscriber lists, or electoral rolls. | N/A<br><br>External validation study: germline mutations in the DNA mismatch repair genes and MUTYH                                                       | N/A<br><br>External validation study: 1181:999 | N/A<br><br>External validation study: 52.0:47.9 | N/A<br><br>External validation study: 53.0 (11.4):59.9 (11.0)                                                                         |
| Jeon 2018 a and b  | Australia, Canada, Germany, Israel and USA. | 1992-2005 (d and v) | Varied between incorporated studies.                                                                                                                                                                                                                                               | Varied between incorporated studies.                                                                                                                                                                                                                                                            | CRC cases with follow-up more than 10 years in cohort-based nested case-control studies. Non-European descent.                                            | 4875:5291 (d)<br>4873:5299 (v)                 | 47.3:44.6 (d)<br>45.7:45.8 (v)                  | Males 67.8 (9.7):68.8 (9.7)<br>Females 68.0 (10.0):69.7 (8.8) (d)<br>Males 68.2 (9.8):68.6 (9.8)<br>Females 68.8 (9.8):69.4 (8.8) (v) |
| Jo 2012a and b     | Korea                                       | 2004-2007 (d and v) | Hospital admission data for first admission event for colorectal cancer in individuals <55 years                                                                                                                                                                                   | Recruited from Korean Metabolic Syndrome Research Initiative study in which volunteers were offered health examinations                                                                                                                                                                         | Low genotyping call rates (<95%), one person in each pair of biological relatives, gender mismatches, missing measurements                                | 54:422 (a)<br>133:554 (b)                      | 0:0 (a)<br>100:100 (b)                          | 49.4 (7.2):<br>41.0 (8.0) (a)<br>49.4 (7.7):<br>42.1 (8.6) (b)                                                                        |
| Jung 2015          | South Korea                                 | 2004-2011 (d)       | New cases of CRC in a cohort who had routine health assessments at health promotion centres in Seoul and GyeongGi province                                                                                                                                                         | Individuals within cohort of those attending routine health assessments at health promotion centres in Seoul and GyeongGi province who did not develop CRC                                                                                                                                      | Prevalent CRC. Missing values for BMI, fasting blood glucose, total cholesterol, systolic blood pressure, smoking status, alcohol drinking, and exercise. | 258: 145584<br>Sub-cohort:<br>173:1514         | 75.9:62.1 Sub-cohort:<br>75.0:62.4              | 50.7 (10.5):<br>41.1 (10.3)<br>Sub-cohort:<br>49.7 (10.9):<br>40.1 (9.4)                                                              |
| Jung 2019          | USA                                         | 1993-2014           | New cases of CRC, according to centralized review of medical charts, in a cohort of postmenopausal women age 50-79 of non-Hispanic white origin recruited from 40 clinical centres nationwide and expected to live near the clinical centres for at least 3 years after enrolment. | Individuals within cohort who did not develop CRC                                                                                                                                                                                                                                               | Follow up <1 year. Any cancer. Diabetes. Duplicates/relatives. Information on covariates unavailable.                                                     | 472:6067                                       | Not reported                                    | 66:68                                                                                                                                 |
| Li 2015            | China                                       | 2009-2012 (d)       | Histological confirmed CRC                                                                                                                                                                                                                                                         | Randomly selected from patients attending outpatient clinic for health                                                                                                                                                                                                                          | Secondary CRC or any other cancer                                                                                                                         | 1066:3880                                      | Not reported                                    | Not reported                                                                                                                          |

|                   |         |                     |                                                                                                                                                                                                                              |                                                                                                  |                                                                 |                                                                            |                                                           |                                                                                     |
|-------------------|---------|---------------------|------------------------------------------------------------------------------------------------------------------------------------------------------------------------------------------------------------------------------|--------------------------------------------------------------------------------------------------|-----------------------------------------------------------------|----------------------------------------------------------------------------|-----------------------------------------------------------|-------------------------------------------------------------------------------------|
|                   |         |                     |                                                                                                                                                                                                                              | check-up with no history of any cancers or related symptoms                                      |                                                                 |                                                                            |                                                           |                                                                                     |
| Procopciuc 2017   | Romania | Not given (d)       | Age 30-76 with histologically confirmed CRC at a single hospital.                                                                                                                                                            | Normal colonoscopy with no evidence of tumours. Selected at same hospital.                       | FAP, Crohn's, HNPCC, missing information on dietary habits.     | 150:162                                                                    | 46.7:38.3                                                 | Males 64.7 (9.2):64.7 (8.3)<br>Females 7.0 (10.8):63.5 (11.7)                       |
| Shiao 2018        | USA     | 2013-2019 (d and v) | Cases age 18-80 and with life expectancy of at least 6 months in database and additional referrals by participants.                                                                                                          | Paired family/friend members                                                                     | Not given                                                       | 53:53                                                                      | 47:26                                                     | 61 (11):47 (17)                                                                     |
| Smith 2018a and b | UK      | 2006-2015 (v)       | New cases of CRC, as recorded in population registries, in participants in UK Biobank cohort age 40-70 and of white ethnicity                                                                                                | Cohort participants not diagnosed with colorectal cancer but fulfilling other inclusion criteria | Participants with missing covariate data. Related participants. | 1623:359920                                                                | 45% cases male                                            | Cases: 57                                                                           |
| Smith 2018a and c | UK      | 2006-2015 (v)       | New cases of CRC, as recorded in population registries, in participants in UK Biobank cohort age 40-70 and of white ethnicity                                                                                                | Cohort participants not diagnosed with colorectal cancer but fulfilling other inclusion criteria | Participants with missing covariate data. Related participants. | 1294:285583                                                                | 46% cases male                                            | Cases: 57                                                                           |
| Wang 2013         | Taiwan  | Not given (d and v) | Pathologically proven colorectal cancer at one hospital                                                                                                                                                                      | Individuals without colorectal cancer at the same hospital (no further details given)            | Samples with a call rate lower than 0.97                        | 218:385                                                                    | Not reported                                              | Not reported                                                                        |
| Weigl 2018        | Germany | 2005-2013           | Participants age 50-79 of German screening colonoscopy programme selected by gastroenterology practice in Southern Germany with colonoscopy reporting most advanced finding as CRC, advanced adenoma or non-advanced adenoma | Participants with colonoscopy reporting no neoplastic lesions                                    | Questionnaire and/or genomic data not available                 | 294:500                                                                    | 65:62                                                     | Not reported                                                                        |
| Xin 2018          | China   | Not given (d and v) | 1. Real data study: Not stated<br>2. Simulation study: Simulation population derived from reference dataset (Ontario Familial Colon Cancer Registry)                                                                         | Not stated                                                                                       | Non-European descent                                            | Simulation study: 594:665 (d)<br>200:200 (v)<br>Real data study: 1316:2229 | Simulation study: 43.3:54.6<br>Real data study: 60.3:57.9 | Simulation study: 60.7 (9.2):63.9 (9.1)<br>Real data study: 58.3 (12.9):57.9 (21.8) |
| Yarnall 2013      | UK      | N/A (v)             | Simulated population of 250,000 individuals                                                                                                                                                                                  | Simulation population of 250,000 individuals                                                     | N/A                                                             | N/A                                                                        | N/A                                                       | N/A                                                                                 |

d – development, v - validation
