# Supplementary material
Source: PubMed Central journal article supplement (PMC7610631)
Supplement: EMS121908-supplement-Supplementary_Table_S2.pdf [file EMS121908-supplement-Supplementary_Table_S2.pdf]

Supplementary Table S2: Discriminatory performance of models

| Author, year                         | AUROC (95% CI) in development population                                                          | AUROC (95% CI) in bootstrap or random split-sample                                                | AUROC (95% CI) in external population or non-random split sample                                  |
|--------------------------------------|---------------------------------------------------------------------------------------------------|---------------------------------------------------------------------------------------------------|---------------------------------------------------------------------------------------------------|
| Genomic risk factors alone           |                                                                                                   |                                                                                                   |                                                                                                   |
| Dunlop 2013a                         |                                                                                                   |                                                                                                   | 0.57                                                                                              |
| Frampton 2016                        |                                                                                                   |                                                                                                   | 0.63*                                                                                             |
| Hosono 2016a                         |                                                                                                   |                                                                                                   | 0.60                                                                                              |
| Ibanez-Sanz 2017a                    |                                                                                                   |                                                                                                   | 0.56 (0.54 to 0.58)                                                                               |
| Jenkins 2016                         |                                                                                                   |                                                                                                   | 0.63*                                                                                             |
| Smith 2018a                          |                                                                                                   |                                                                                                   | 0.57 (0.55-0.58)<br>0.56 (0.55-0.58)                                                              |
| Wang 2013                            | 0.77                                                                                              | 0.724                                                                                             |                                                                                                   |
| Xin 2018a                            | Simple count 0.60 (0.59–0.61)<br>Weighted (LR) 0.60 (0.59-0.62)<br>Weighted (OR) 0.60 (0.58-0.62) | Simple count 0.60 (0.59–0.61)<br>Weighted (LR) 0.61 (0.60-0.62)<br>Weighted (OR) 0.60 (0.59-0.61) | Simple count 0.60 (0.56–0.64)<br>Weighted (LR) 0.59 (0.54-0.63)<br>Weighted (OR) 0.60 (0.56-0.64) |
| Genomic plus phenotypic risk factors |                                                                                                   |                                                                                                   |                                                                                                   |
| Abe 2017                             |                                                                                                   | 0.64                                                                                              | 0.57                                                                                              |
| Dunlop 2013b                         | 0.62 (0.58-0.74)                                                                                  | 0.59                                                                                              | 0.57 and 0.56                                                                                     |
| Hosono 2016b                         | 0.7167                                                                                            |                                                                                                   | 0.64                                                                                              |
| Hsu 2015                             |                                                                                                   |                                                                                                   | Male 0.59 (0.54-0.64)<br>Female 0.56 (0.51-0.61)                                                  |
| Ibanez-Sanz 2017b                    | 0.65                                                                                              | 0.63 (0.60-0.66)                                                                                  |                                                                                                   |
| Iwasaki 2017                         |                                                                                                   | 0.66 (0.61-0.74)                                                                                  |                                                                                                   |
| Jeon 2018 (female)                   |                                                                                                   | 0.62 (0.61-0.63)                                                                                  |                                                                                                   |
| Jeon 2018 (male)                     |                                                                                                   | 0.63 (0.62–0.64)                                                                                  |                                                                                                   |
| Jo 2012a (female)                    | Simple count 0.65 (0.62-0.6802)<br>Weighted 0.65 (0.61-0.67)                                      | Simple count 0.60 (0.56-0.64)<br>Weighted 0.58 (0.55-0.62)                                        |                                                                                                   |
| Jo 2012b (male)                      | Simple count 0.73 (0.68-0.77)<br>Weighted 0.72 (0.68-0.76)                                        | Simple count 0.70 (0.65-0.74)<br>Weighted 0.69 (0.64-0.73)                                        |                                                                                                   |
| Jung 2015                            | 0.74 (0.70–0.78) **                                                                               |                                                                                                   |                                                                                                   |
| Jung 2019                            | 0.93                                                                                              |                                                                                                   |                                                                                                   |
| Li 2015                              | Simple count 0.58 (0.57-0.60)<br>Weighted 0.59 (0.57-0.61)                                        |                                                                                                   |                                                                                                   |
| Procopciuc 2017                      | 0.90 (0.86-0.93)                                                                                  |                                                                                                   |                                                                                                   |
| Shiao 2018                           |                                                                                                   | 0.85                                                                                              |                                                                                                   |
| Smith 2018b                          |                                                                                                   |                                                                                                   | 0.67 (0.65-0.68)                                                                                  |
| Smith 2018c                          |                                                                                                   |                                                                                                   | 0.69 (0.67-0.70)                                                                                  |
| Weigl 2018                           | 0.67                                                                                              |                                                                                                   |                                                                                                   |
| Xin 2018b                            | 0.61                                                                                              | 0.61                                                                                              | 0.61                                                                                              |
| Yarnall 2013                         |                                                                                                   |                                                                                                   | 0.63*                                                                                             |

AUROC – area under the receiver operating characteristic curve, \* Simulated populations \*\* Unclear whether this is simple or weighted genetic risk score, LR – logistic regression; OR – Odds ratio
