# Supplementary material
Source: PubMed Central journal article supplement (PMC7610631)

Supplementary Figure S1. PRISMA flow diagram

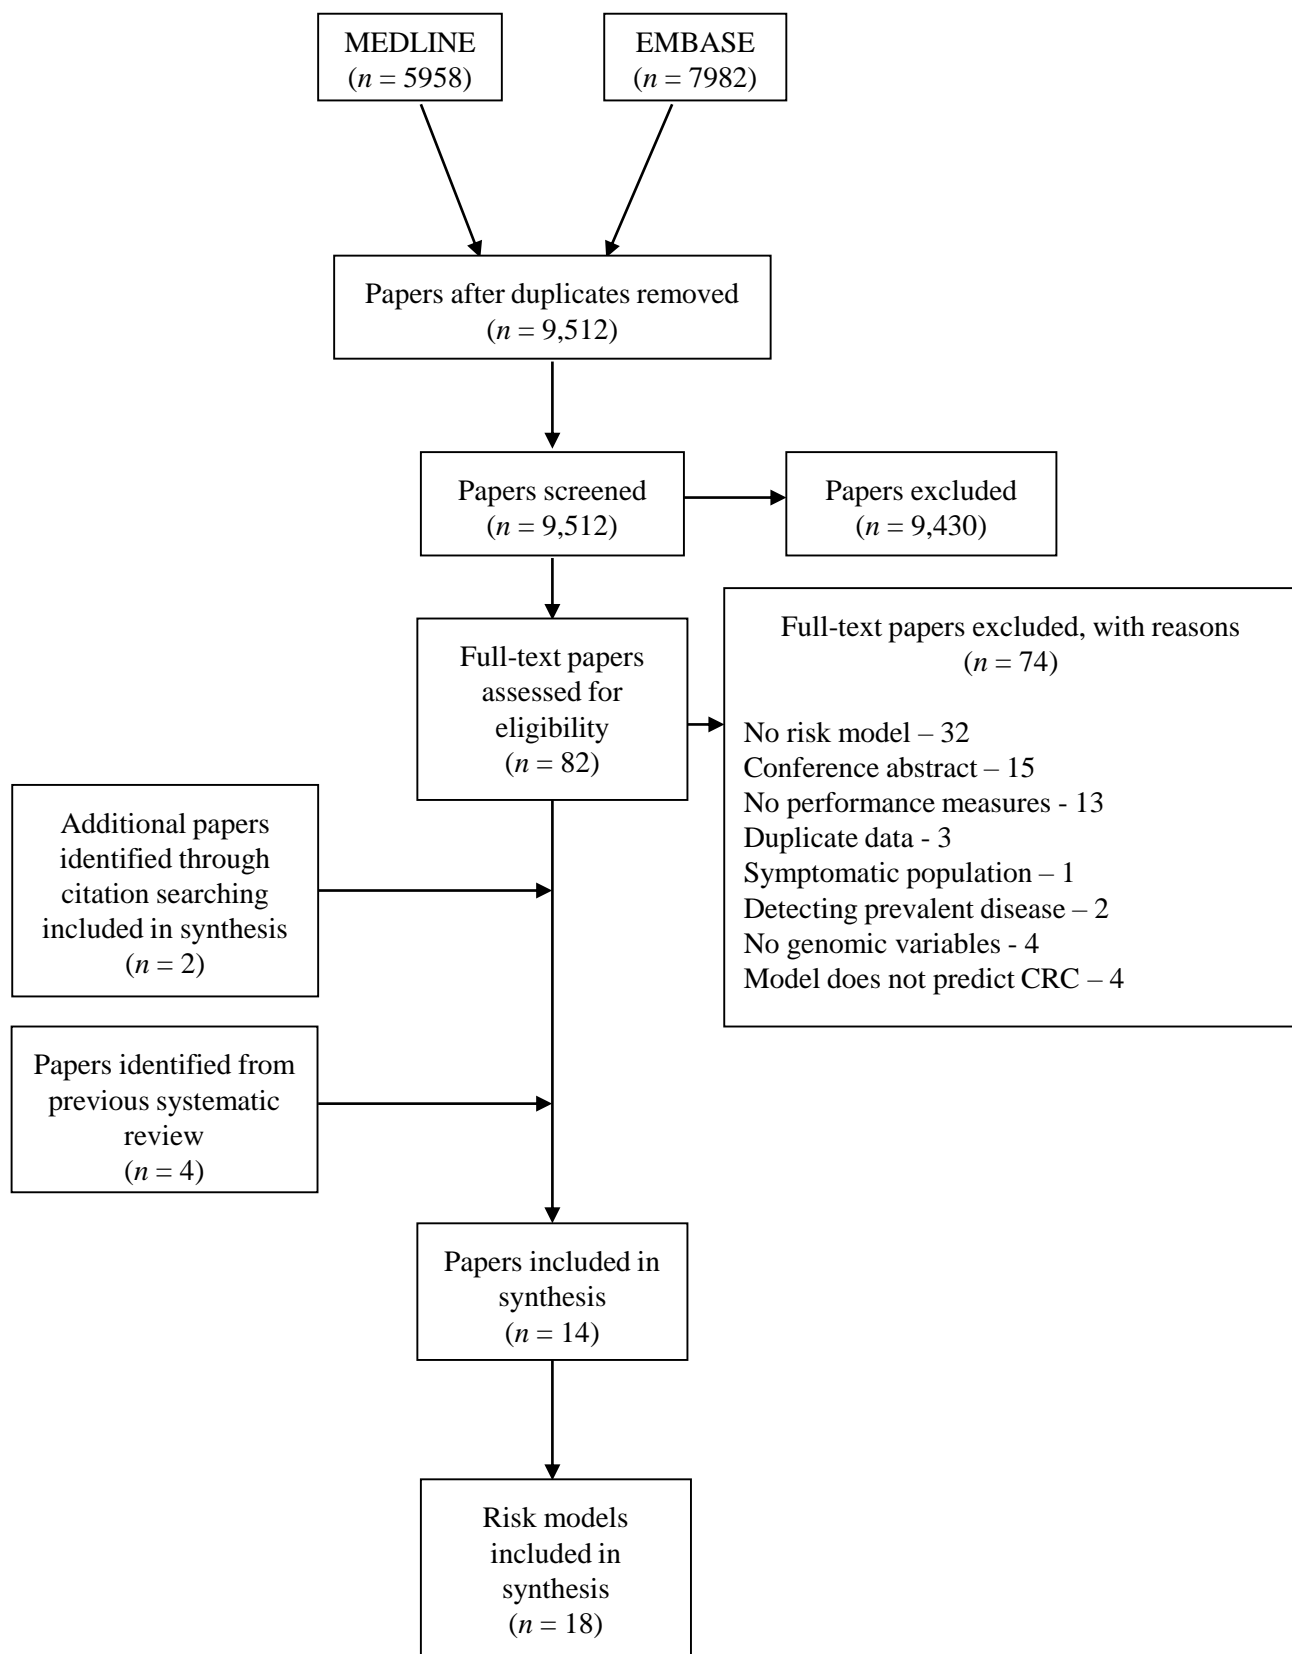

Supplement: EMS121908-supplement-Supplementary_Figure_S1.pdf [file EMS121908-supplement-Supplementary_Figure_S1.pdf]
